# Supplementary material for: PLGA-PEG-PLGA hydrogel with NEP1-40 promotes the functional recovery of brachial plexus root avulsion in adult rats
Source: PeerJ. 2021 Nov 1;9:e12269. doi: 10.7717/peerj.12269 (PMC8567856; doi:10.7717/peerj.12269)
Supplement: Supplemental Information 1 [file peerj-09-12269-s001.xlsx]

## Sheet: Sheet1
	Sol(℃)	Precipitate(℃)
15(wt%)	39	44
20(wt%)	33	55
25(wt%)	26	62
30(wt%)	23	67
