# Supplementary material for: PLGA-PEG-PLGA hydrogel with NEP1-40 promotes the functional recovery of brachial plexus root avulsion in adult rats
Source: PeerJ. 2021 Nov 1;9:e12269. doi: 10.7717/peerj.12269 (PMC8567856; doi:10.7717/peerj.12269)
Supplement: Supplemental Information 2 [file peerj-09-12269-s002.xlsx]

## Sheet: Sheet1
Day	1	3	5	7	10	14
Measure 1(%)	38.7	47.9	57.7	63.9	64.2	70.8
Measure 2(%)	32.3	45.3	54.8	57.1	65.4	68.2
Measure 3(%)	37.1	52.1	53.6	62.4	69.5	69.4
Mean(%)	36.0333	48.4333	55.3667	61.1333	66.3667	69.4667
SD	3.33067	3.43123	2.10792	3.57258	2.77909	1.30128
