# Supplementary material for: PLGA-PEG-PLGA hydrogel with NEP1-40 promotes the functional recovery of brachial plexus root avulsion in adult rats
Source: PeerJ. 2021 Nov 1;9:e12269. doi: 10.7717/peerj.12269 (PMC8567856; doi:10.7717/peerj.12269)
Supplement: Supplemental Information 3 [file peerj-09-12269-s003.xlsx]

## Sheet: Sheet1
2-6 weeks TGT
Control	weeks	NO.1	NO.2	NO.3	NO.4	NO.5	NO.6	NO.7	NO.8
	2	2	2	1	1	2	1	2	1
	3	2	2	2	2	3	2	2	1
	4	2	3	3	2	3	2	2	2
	5	3	3	4	4	3	3	2	2
	6	3	4	5	4	3	3	2	2
Gel	weeks	NO.1	NO.2	NO.3	NO.4	NO.5	NO.6	NO.7	NO.8
	2	2	1	2	2	1	2	2	2
	3	3	2	2	3	1	2	2	2
	4	3	3	3	3	1	2	2	3
	5	4	4	3	4	3	3	2	3
	6	4	5	5	4	3	3	2	4
NEP1-40	weeks	NO.1	NO.2	NO.3	NO.4	NO.5	NO.6	NO.7	NO.8
	2	2	1	2	2	3	2	2	1
	3	2	2	3	2	3	2	2	2
	4	3	3	4	4	3	3	3	2
	5	3	4	4	5	4	3	4	3
	6	4	5	5	5	4	3	4	4
Gel+NEP1-40	weeks	NO.1	NO.2	NO.3	NO.4	NO.5	NO.6	NO.7	NO.8
	2	2	1	2	3	3	2	2	2
	3	3	2	2	3	3	3	3	2
	4	4	3	3	4	4	4	3	3
	5	5	4	4	5	4	4	4	3
	6	5	5	5	5	4	4	5	4
