# Supplementary material for: PLGA-PEG-PLGA hydrogel with NEP1-40 promotes the functional recovery of brachial plexus root avulsion in adult rats
Source: PeerJ. 2021 Nov 1;9:e12269. doi: 10.7717/peerj.12269 (PMC8567856; doi:10.7717/peerj.12269)
Supplement: Supplemental Information 4 [file peerj-09-12269-s004.xlsx]

## Sheet: Sheet1
6 weeks TGT
	Control	Gel	NEP1-40	Gel+NEP1-40
NO.1	3	4	4	5
NO.2	4	5	5	5
NO.3	5	5	5	5
NO.4	4	4	5	5
NO.5	3	3	4	4
NO.6	3	3	3	4
NO.7	2	2	4	5
NO.8	2	4	4	4
	3.25	3.75	4.25	4.625
