# Supplementary material for: PLGA-PEG-PLGA hydrogel with NEP1-40 promotes the functional recovery of brachial plexus root avulsion in adult rats
Source: PeerJ. 2021 Nov 1;9:e12269. doi: 10.7717/peerj.12269 (PMC8567856; doi:10.7717/peerj.12269)
Supplement: Supplemental Information 5 [file peerj-09-12269-s005.xlsx]

## Sheet: Sheet1
		Ratio of CHAT+ cell on the right side to that left side
		Control	Gel	NEP1-40	Gel+NEP1-40
		0.56	0.52	0.73	0.76
		0.51	0.59	0.63	0.8
		0.47	0.61	0.75	0.65
		0.513333	0.573333	0.703333	0.736667
