# Supplementary material for: PLGA-PEG-PLGA hydrogel with NEP1-40 promotes the functional recovery of brachial plexus root avulsion in adult rats
Source: PeerJ. 2021 Nov 1;9:e12269. doi: 10.7717/peerj.12269 (PMC8567856; doi:10.7717/peerj.12269)
Supplement: Supplemental Information 6 [file peerj-09-12269-s006.xlsx]

## Sheet: Sheet1
FG
Control	Gel	NEP1-40	Gel+NEP1-40
864	889	1075	1137
735	759	1138	1210
720	821	916	1053
773	823	1043	1133.33
