# Supplementary material for: PLGA-PEG-PLGA hydrogel with NEP1-40 promotes the functional recovery of brachial plexus root avulsion in adult rats
Source: PeerJ. 2021 Nov 1;9:e12269. doi: 10.7717/peerj.12269 (PMC8567856; doi:10.7717/peerj.12269)
Supplement: Supplemental Information 7 [file peerj-09-12269-s007.xlsx]

## Sheet: Sheet1
Area of MEPs(μm2)
Control	Gel	NEP1-40	Gel+NEP1-40
1011.94	1208.87	1420.81	1505.71
984.434	972.242	1329.45	1304.28
971.448	952.734	1251.1	1284.4
924.151	806.066	1232.59	1267.09
820.816	779.109	1129.14	1247.21
785.204	767.444	1107.32	1228.32
781.146	735.306	1100.22	1190.99
740.492	700.114	1020.58	1175.38
704.586	691.76	907.129	1108.94
682.342	691.736	859.14	1058.01
680.253	691.243	829.538	1055.54
675.814	685.812	827.322	1024.21
615.248	672.105	775.085	976.744
597.804	632.171	751.562	917.152
590.232	621.536	733.789	905.914
563.391	598.819	688.542	855.742
560.04	596.208	681.361	794.916
552.618	593.976	641.818	793.508
542.511	579.352	635.32	768.102
539.693	569.035	615.104	742.433
522.092	567.148	595.61	678.722
517.31	566.162	591.278	652.656
507.778	561.405	589.624	641.337
505.066	545.108	586.946	639.62
501.641	528.914	581.17	616.186
498.989	523.109	579.004	604.341
497.514	522.18	573.228	599.719
494.479	521.248	571.697	565.292
491.254	519.014	571.529	557.413
486.698	518.853	567.452	549.836
485.178	517.636	567.133	540.022
478.322	517.561	563.802	527.748
469.219	516.192	563.12	511.752
467.776	514.456	562.57	508.254
460.202	513.352	554.149	499.861
455.596	511.618	552.293	593.8
447.277	510.417	547.958	496.274
439.168	509.631	545.792	491.411
434.279	409.316	535.89	591.205
431.392	508.898	534.672	495.99
423.405	500.152	532.074	490.343
420.592	497.965	521.452	597.221
416.05	495.776	520.007	484.592
414.507	492.621	518.038	483.365
412.62	490.145	514.746	493.132
411.898	477.294	508.248	480.52
399.624	476.428	498.155	472.987
399.031	474.156	488.754	471.201
398.823	472.872	478.636	468.185
397.458	471.328	474.314	461.449
396.986	470.142	473.521	446.122
393.248	468.239	472.87	428.866
390.235	467.096	472.659	425.501
388.078	462.258	463.484	421.483
385.184	461.32	443.99	414.19
383.218	457.071	428.828	511.75
380.13	452.656	422.33	408.351
371.416	452.123	420.124	406.824
358.497	450.231	413.666	405.165
357.626	441.82	410.053	403.127
352.637	440.126	409.334	389.18
348.178	438.052	405.002	486.353
343.943	436.05	400.67	384.028
341.864	429.294	392.005	379.341
339.532	423.162	389.84	578.397
337.571	422.135	385.508	364.824
334.088	420.166	384.786	363.412
332.283	419.967	379.01	361.084
327.424	419.138	378.288	360.19
325.31	414.145	377.566	349.154
323.202	412.946	376.027	348.383
320.348	411.527	376.844	342.021
319.379	407.195	372.512	538.732
317.316	392.591	368.18	335.989
314.428	392.123	364.57	328.336
313.706	389.12	363.121	325.118
309.374	384.129	360.96	524.073
381.303	383.922	359.592	323.121
308.22	382.516	356.628	322.986
306.486	381.911	355.905	321.002
305.108	381.98	351.574	318.577
303.591	368.736	350.802	418.134
298.215	367.731	348.386	317.001
297.822	363.423	347.911	417.079
296.378	362.406	347.24	316.613
287.87	359.188	345.133	416.545
286.404	352.217	343.632	315.232
289.231	350.132	342.91	310.17
285.548	348.689	338.578	308.161
284.87	348.162	336.412	407.672
283.294	347.966	334.246	302.949
282.259	346.522	325.138	300.125
282.66	345.521	323.016	298.864
281.654	341.468	321.25	398.411
279.772	340.474	320.528	297.236
278.762	330.103	315.474	396.108
276.684	318.365	314.03	294.942
273.152	318.234	312.011	287.568
269.164	301.036	309.698	286.232
268.352	300.313	308.976	386.194
267.889	299.321	305.321	278.053
265.254	299.042	302.478	275.948
261.722	296.252	300.362	263.402
258.309	291.803	299.59	460.675
258.112	291.161	298.146	258.131
253.132	290.806	293.092	254.802
251.17	294.257	288.76	248.534
249.282	295.919	287.316	241.296
248.752	296.273	286.594	229.375
247.188	292.005	285.783	528.134
246.356	288.932	284.428	226.237
242.586	288.896	282.5	225.845
241.142	287.318	282.262	424.616
237.539	286.781	281.54	219.804
223.456	285.592	280.096	319.982
222.012	282.986	278.652	217.631
220.568	277.012	277.208	211.507
220.236	272.156	272.876	408.128
217.204	271.434	264.934	207.153
215.514	270.821	264.212	204.28
206.362	270.306	255.548	204.024
203.953	262.428	249.772	203.137
200.352	261.046	248.328	200.662
199.63	260.265	247.606	199.14
198.142	257.571	245.44	198.079
196.792	256.272	244.718	197.574
191.685	255.74	240.383	194.801
188.148	254.828	240.312	191.733
185.19	253.384	230.278	187.614
179.722	252.257	228.834	187.138
177.138	251.246	227.39	185.362
175.566	250.887	224.502	182.123
173.316	250.234	221.614	180.289
164.442	244.186	220.892	177.704
161.727	243.998	218.003	172.183
160.642	241.191	217.069	164.258
158.232	240.388	214.394	160.925
157.139	239.162	211.506	160.108
155.336	239.156	210.784	159.523
153.786	238.217	207.896	158.844
150.534	238.222	206.101	157.218
149.812	236.256	205.733	155.196
147.114	236.13	202.457	154.811
144.394	236.051	199.954	152.708
141.426	234.897	197.788	150.002
137.994	234.612	197.066	149.138
129.596	233.981	196.344	144.366
129.431	233.129	194.9	143.935
126.708	232.362	186.594	141.108
120.696	228.792	184.792	136.291
125.738	228.34	183.82	135.495
124.264	228.323	180.46	134.243
123.456	227.392	178.294	133.318
119.484	225.948	176.128	129.526
116.992	223.231	173.962	128.084
115.878	223.06	160.844	125.813
114.226	222.679	158.218	123.418
108.38	222.338	158.073	121.236
107.748	221.59	150.136	119.278
104.833	220.894	147.97	117.051
99.272	216.298	145.804	115.486
94.94	215.111	141.472	114.733
93.704	213.674	140.175	113.87
92.496	210.455	138.584	109.132
87.187	209.217	133.523	107.225
81.232	206.45	130.642	104.606
79.704	203.128	129.131	104.713
78.816	202.122	128.476	104.159
71.114	200.215	124.862	94.322
69.906	199.956	116.924
65.111	197.842	114.758
63.894	196.268	107.533
57.052	196.197	103.928
542.14	194.902	101.051
52.348	192.014	99.596
50.897	191.168	95.264
	190.57	85.156
	188.296	85.141
	181.905	79.38
	181.841	78.653
	180.236	76.49
	180.219	72.883
	176.13	65.662
	174.132
	170.323
	167.282
	165.3
	165.287
	164.312
	160.539
	157.721
	156.252
	155.748
	148.861
	147.107
	145.806
	144.035
	143.218
	142.944
	140.129
	138.586
	138.183
	137.216
	131.182
	128.153
	127.756
	126.124
	119.81
	117.654
	117.175
	116.873
	114.108
	112.594
	110.398
	104.214
	103.521
	97.15
	95.988
	93.496
	57.105
	65.134
	73.193
