# Supplementary material for: PLGA-PEG-PLGA hydrogel with NEP1-40 promotes the functional recovery of brachial plexus root avulsion in adult rats
Source: PeerJ. 2021 Nov 1;9:e12269. doi: 10.7717/peerj.12269 (PMC8567856; doi:10.7717/peerj.12269)
Supplement: Supplemental Information 8 [file peerj-09-12269-s008.xlsx]

## Sheet: Sheet1
HE (um)
Control	Gel	NEP1-40	Gel+NEP1-40
42.1	43.7	44.2	50.5
30.2	42.5	44.1	50.2
29.9	40.9	43.7	49.7
39.6	40.2	42.7	49.6
39	39.7	42.5	49.5
38.5	39.5	40.8	49.2
38.2	39.3	40.2	48.2
38	39	39.8	48.1
37.9	38.9	39.1	48
37.7	38.6	38.1	47.9
37.3	38.1	38	47.8
37.2	37.9	37.4	47.5
36.7	37.8	37.2	47.3
36.7	37.6	36.9	46.6
35.8	37.2	36.6	46.5
35.3	37.2	36	46.3
35.3	37.1	35.8	46.1
35.1	36.8	35.3	45.9
35.1	36.5	35.2	45.7
34.8	36.2	34.7	45.4
34.7	36	34.5	45.2
34.6	35.9	34.2	44.9
34.4	35.7	34.1	44.8
34	35.5	33.9	44.2
33.8	35.2	33.8	44.1
33.5	35.1	33.7	43.6
32.7	35	33.5	43.3
32.5	34.9	33.1	43.2
32.4	34.6	33.1	43
32.2	34.5	33	42.8
32	34.2	32.9	42.8
31.7	34	32.7	42.7
31.3	33.8	32.5	42.5
31.3	33.3	32	42.2
31.1	33.1	31.9	42.1
31	32.8	31.8	42
30.8	32.6	31.6	41.9
30.7	32.4	31.4	41.8
30.6	32.3	31.1	41.2
30.5	32.1	31	41.1
30.5	32	30.7	41
30.4	31.6	30.4	40.8
30.3	31	30.4	40.7
30	30.9	30.1	40.6
29.8	30.3	30	40.5
29.7	30	30	40.3
29.5	29.9	29.9	40.3
29.5	29.8	29.9	40.2
29.4	29.7	29.8	39.9
29.2	29.1	29.7	39.7
28.6	29	29.6	39.6
28.5	29	29.6	39.5
28.1	28.9	29.4	39.2
28	28.9	29.4	39.2
27.9	28.7	29.3	39.1
27.8	28.6	29.2	39
27.8	28.6	29.1	38.9
27.6	28.5	29	38.8
27.4	28.4	28.9	38.7
27.3	28.4	28.8	38.2
28.3	28.3	28.7	37.8
27	28.3	28.7	37.6
26.9	28.2	28.6	37.4
26.8	28.1	28.5	37.3
26.8	28.1	28.4	37.2
26.8	28	28.4	36.9
26.6	27.9	28.3	36.8
27.5	27.8	28.2	36.8
26.4	27.7	28.1	36.8
26.3	27.7	28	36.7
26.2	27.6	27.9	36.7
26.2	27.5	27.8	36.2
26.1	27.5	27.7	35.9
26	27.4	27.6	35.7
27.9	27.4	27.6	35.5
25.9	27.3	27.6	35.2
25.8	27.2	27.5	35.1
25.7	27.2	27.5	34.9
27.7	27.1	27.5	34.7
24.6	27.1	27.5	34.5
25.4	27	27.4	34.4
25	26.9	27.3	34.3
25.3	26.9	27.3	34.2
25.2	26.8	27.2	34
25.2	26.8	27.2	33.9
25.1	26.7	27.1	33.7
25	26.7	27.1	33.2
24.9	26.5	27	33.2
24.8	26.5	27	33.1
24.5	26.5	26.9	33
24.4	26.4	26.9	32.9
24.3	26.4	26.8	32.9
24.2	26.4	26.8	32.8
24.2	26.3	26.8	32.8
24.1	26.3	26.7	32.8
23.7	26.3	26.7	32.7
23.6	26.2	26.6	32.6
23.5	26.1	26.6	32.6
23.4	26	26.5	32.5
23.8	25.9	26.5	32.4
23.1	25.9	26.4	32.2
23	25.8	26.4	32.2
22.8	25.8	26.3	32.1
22.7	25.7	26.3	31.8
23.7	25.5	26.2	31.8
22.5	25.5	26.2	31.7
22	25.4	26.1	31.7
22.5	25.4	26.1	31.6
22.1	25.3	26.1	31.6
22.4	25.3	26	31.5
21.3	25.2	26	31.3
27.3	25.1	25.9	31.2
22.2	25.1	25.8	31.1
20.8	25	25.8	30.8
22.3	25	25.7	30.7
22.7	24.8	25.6	30.7
22.1	24.7	25.5	30.5
22	24.6	25.5	30.4
22	24.3	25.4	30.4
21.7	24.3	25.4	30.4
21.6	24.1	25.4	30.3
21.5	24.1	25.3	30.2
21.5	24	25.3	30
21.3	33.9	25.2	30
21.1	23.7	25.2	29.9
20.8	23.7	25.1	29.7
20.8	23.6	25.1	29.7
20.7	23.6	25.1	29.8
20.5	23.5	24.9	29.6
20.2	23.5	24.7	29.2
20.1	23.3	24.6	29.5
20	23.3	24.4	29.5
19.9	23.2	24.4	29.4
19.7	23.2	24.3	29.3
19.7	23.1	24.2	29.1
19.5	23	24.2	28.9
19.6	22.9	24.1	28.7
19.3	22.8	24	28.6
19.2	22.8	23.9	28.5
19	22.7	23.7	28.5
19.2	22.7	23.6	28.4
19.1	22.6	23.5	28.4
18.8	22.5	23.5	28.3
18.6	22.4	23.5	28.2
18.4	22.3	23.5	28.2
18.4	22.3	23.2	28.1
18.3	22.2	23.2	28.1
18.1	22.1	23.1	28
18	22	23.1	28
17.9	21.9	23	27.9
17.8	21.9	23	27.8
17.7	21.8	22.9	27.7
16.7	21.7	22.9	27.6
17.2	21.6	22.8	27.5
17.1	21.6	22.8	27.4
17	21.5	22.7	27.3
16.6	31.4	22.5	27.2
16.4	21.3	22.4	27.2
16.3	21.1	22.2	15.1
16.1	21	22.1	27.1
15.9	21	22	27
15.6	20.9	22	27
14.6	20.8	21.9	26.9
15.4	20.7	21.8	26.8
15.3	20.7	21.7	26.7
15	20.6	21.7	26.6
14.8	20.6	21.6	26.4
14.7	20.5	21.4	26.4
14.2	20.5	21.3	26.3
14.1	20.4	21.1	26.3
13.6	20.3	21	26.2
13.6	20.3	20.9	26.2
13.5	20.2	20.8	26.1
13.5	20.1	20.5	26.1
13.1	20.1	20.4	25.9
12.9	20	20.2	25.4
12.3	20	20.1	25.3
12.9	19.9	20	25.2
14.9	19.9	19.9	25.1
13.7	19.7	19.5	25
13.6	19.6	18.6	24.8
12.6	19.5	18.3	24.8
12.5	19.5	18.2	24.6
12.9	19.4	18.1	24.3
12.4	19.4	17.8	24.1
12.3	19.3	17.5	24
12.2	19.3	17.3	23.9
12.1	19.2	17.1	23.9
12	19.2	16.9	23.8
11.9	19.1	16.7	23.7
11.8	19	16.2	23.4
11.4	18.9	16	23.3
11.3	18.8	15.9	23.2
11.5	18.7	15.8	23.1
11.2	18.4	15.5	23
11.1	18.3	15.3	22.9
11.2	18.3	15.1	22.7
11	18.2	15.1	22.5
10	18	15	22.4
10.9	17.9	14.8	22.3
10.7	17.6	14.5	18.3
10.4	17.6	14.1	22.3
10.2	17.5	13.6	22.1
8.2	17.4	12.9	22
10.1	17.3	12.8	21.9
9.8	17.2	12.4	21.7
9.7	17.1	12.4	21.6
9.5	17	12.3	21.4
9.5	16.9	12.2	21.6
9.3	16.3	12.1	21.3
8.1	16.2	12	21.2
7.6	16.2	11.9	21.2
	16.1	11.8	11
	16	11.7	21
	15.7	11.4	20.7
	15.6	11.3	20.9
	15.4	11.2	14.8
	15.3	10.4	20.6
	15.3	10.2	10.5
	15.2	10.1	20.5
	15.1	9.8	20.4
	14.8	9.7	20.2
	14.7	8.9	19.2
	14.6	8.7	19.4
	14.6	8.2	9.3
	14.5		19.3
	14.2		13.4
	14		12.3
	13.7		12.2
	13.6		11.2
	13.5		19.1
	13.5		19
	13.2		18.9
	13		18.9
	12.9		18.6
	12.7		18.4
	12.5		18.2
	12.3		18.1
	12.1		17.9
	12.1		17.7
	11.8		17.5
	11.8		17.4
	11.7		17.2
	11.7		17
	11.3		16.7
	11.2		16.6
	11.1		16.5
	11		16.2
	10.9		16.4
	10.9		16
	10.8		15.7
	10.7		15.1
	10.6		15.3
	10.5		15
	10.2		14.9
	10.1		14.3
	10		14.1
	9.9		13.8
	9.6		13.3
	19.4		13.1
	9.4		13
	9		12.8
	8.9		12.5
	8.6		12.4
	8.1		12.3
	8		12
			12.2
			11.8
			11.2
			10.9
			10.5
			10.3
			10
			9.8
			9.7
			9.1
			8.9
			7.4
			7.2
